# Supplementary material
Source: PubMed Central journal article supplement (PMC4281292)

A.

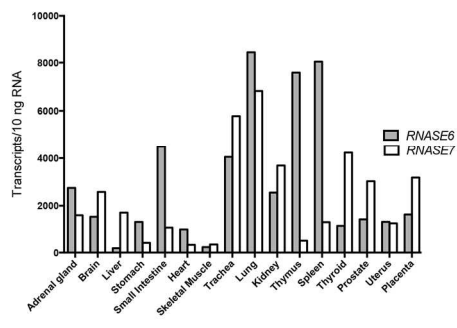

B.

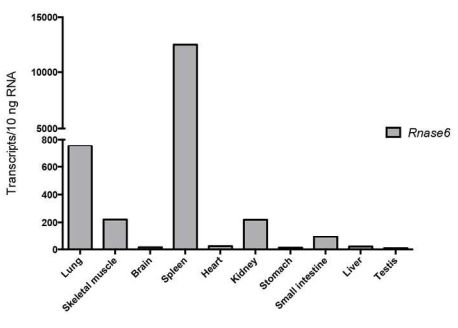

Supplemental Figure 1  
186x67mm (300 x 300 DPI)

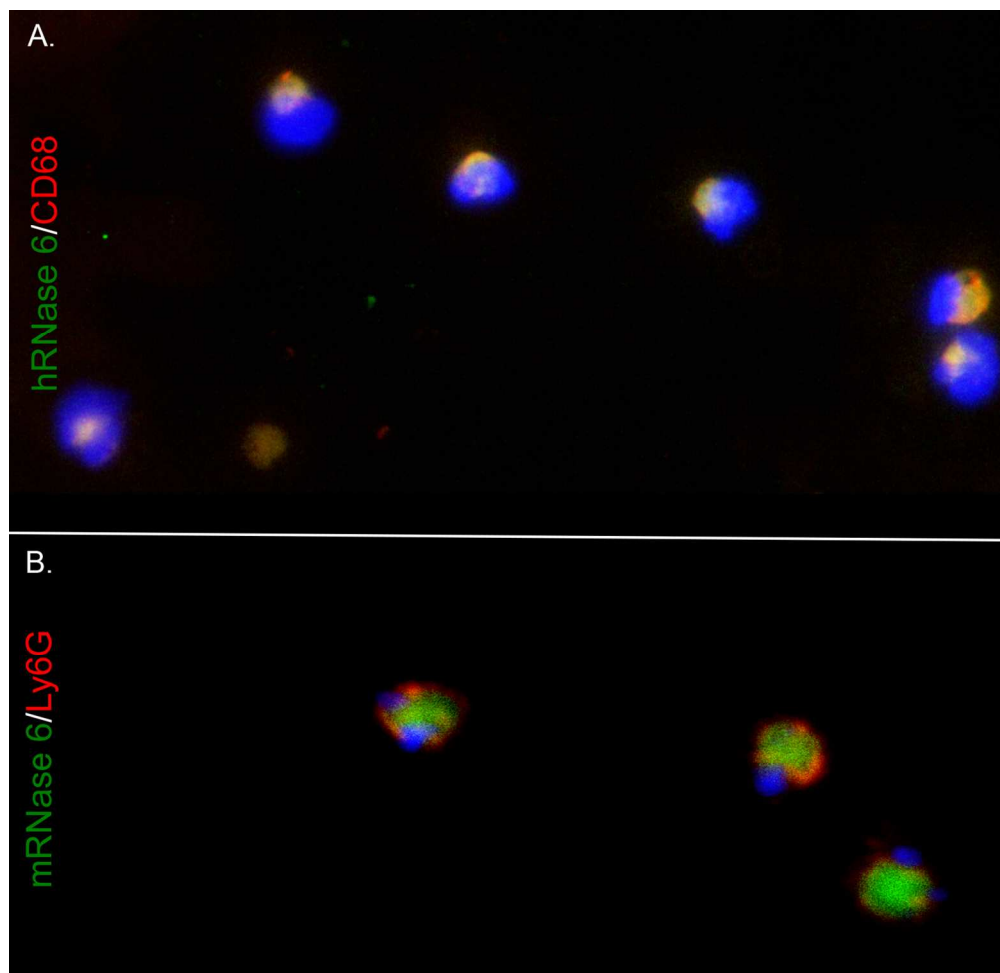

Supplemental Figure 2  
186x179mm (300 x 300 DPI)

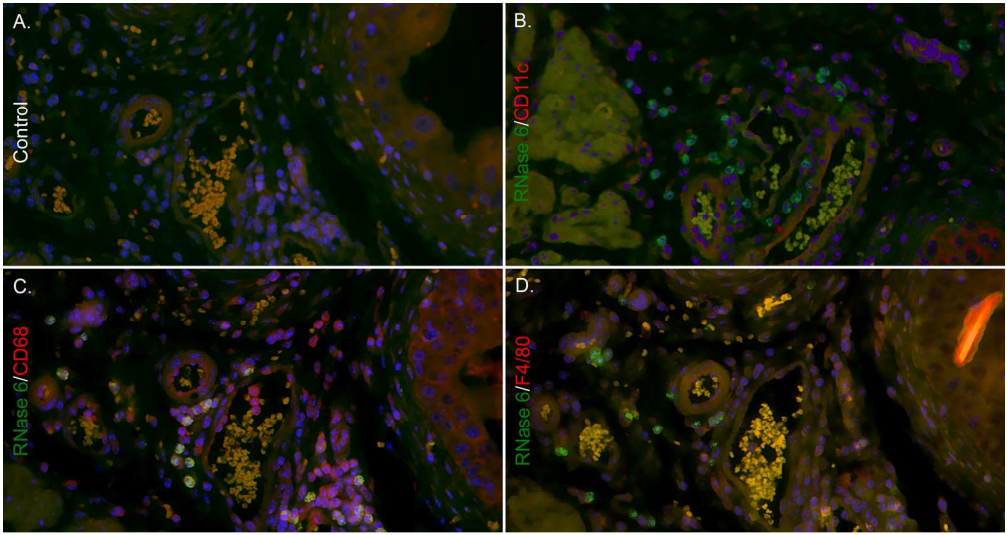

Supplemental Figure 3  
186x98mm (300 x 300 DPI)

Supplement: NIHMS609516-supplement-supplement_1.pdf [file NIHMS609516-supplement-supplement_1.pdf]
